# Supplementary material for: Ca2+ participating self-assembly of an apoferritin nanostructure for nucleic acid drug delivery
Source: Royal Society of Chemistry journal article supplement (doi:10.1039/d0nr00547a), 2020-01-01
Supplement: d0nr00547a1.pdf [file d0nr00547a1.pdf]

# Ca<sup>2+</sup> Incorporated Self-assembly of Apoferritin Nanostructure for Nucleic Acid Drugs Delivery

Haiqin Huang<sup>a</sup>, Kang Sha<sup>a</sup>, Hanitrarimalala Veroniaina<sup>a</sup>, Ziheng Wu<sup>b</sup>, Zhenghong Wu<sup>\*,a</sup>, and Xiaole Qi<sup>\*,a,b</sup>

<sup>a</sup>Key Laboratory of Modern Chinese Medicines, China Pharmaceutical University, Nanjing 210009, P. R. China

<sup>b</sup>ARC Centre of Excellence in Convergent Bio-Nano Science and Technology, Monash Institute of Pharmaceutical Sciences, Monash University, 381 Royal Parade, Parkville, Victoria 3052, Australia

\*Corresponding author.

E-mail address: Zhenghong Wu ([zhenghongwu66@cpu.edu.cn](mailto:zhenghongwu66@cpu.edu.cn)); Xiaole Qi ([qixiaole523@cpu.edu.cn](mailto:qixiaole523@cpu.edu.cn))

## **Methods**

### **Preparation of Ca<sup>2+</sup>-siRNA complexes**

Equal volumes of siRNA (8.75  $\mu$ M) and CaCl<sub>2</sub> (20 mM-1M) were mixed together in an equal volume of pH8.0 buffer (20 mM Tris, 0.15 M NaCl, pH 8.0) by vortexing for 30 s and incubating for 20 min at room temperature (RT). The Ca<sup>2+</sup>-siRNA nanoparticles were treated with 3 mg/mL RNase A at 37 °C for 30 min, followed by a treatment with 5mg/mL Proteinase K at 37 °C for 30 min. 2% agarose gel electrophoresis (AGE) was used to demonstrate the successful loading and protection of siRNA.

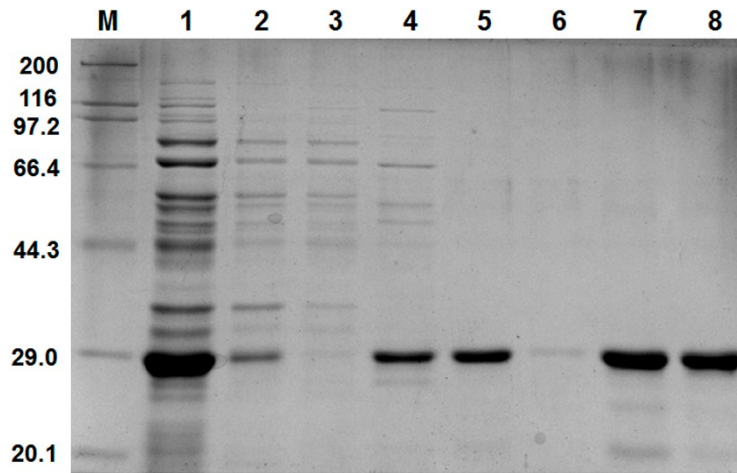

**Figure S1.** The purification of HFn was analyzed by 12 % SDS-PAGE. Lane M: Protein marker; Lane 1: supernatant after heat; Lane 2: sample effluent; Lane 3: effluent washed by binding buffer; Lane 4 - 8: HFn effluent eluted by 30 mM, 50 mM, 70 mM, 90 mM and 300 mM imidazole respectively.

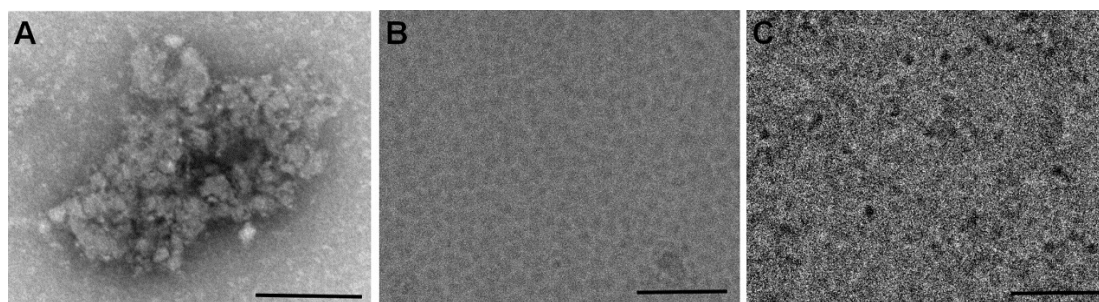

**Figure S2. (A)** TEM photograph of HFn in pH 2.0 buffer (20 mM Tris, 0.15 M NaCl).

**(B)** Cryo-TEM images of HFn@siRNA NPs. **(C)** Cryo-TEM images of HFn@Ca NPs.

Scale bar of A, 100 nm, Scale bar of B and C, 50 nm.

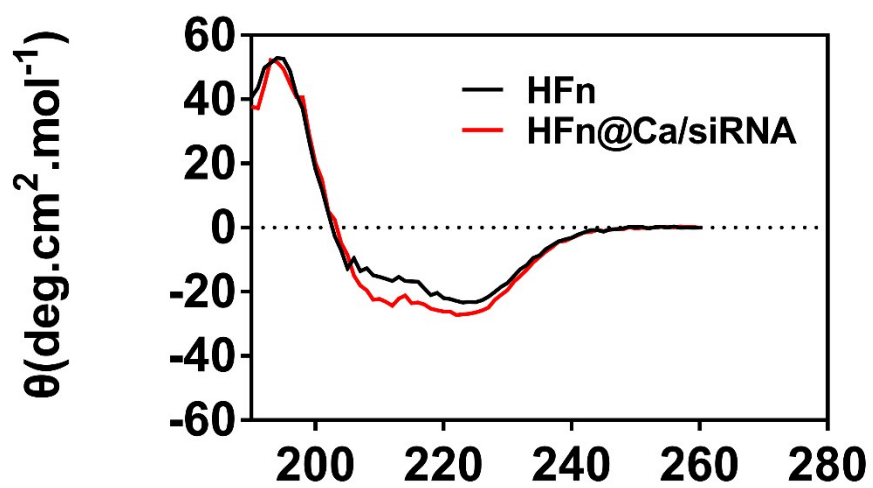

Figure S3. CD spectra results of HFn and HFn@Ca/siRNA NPs.

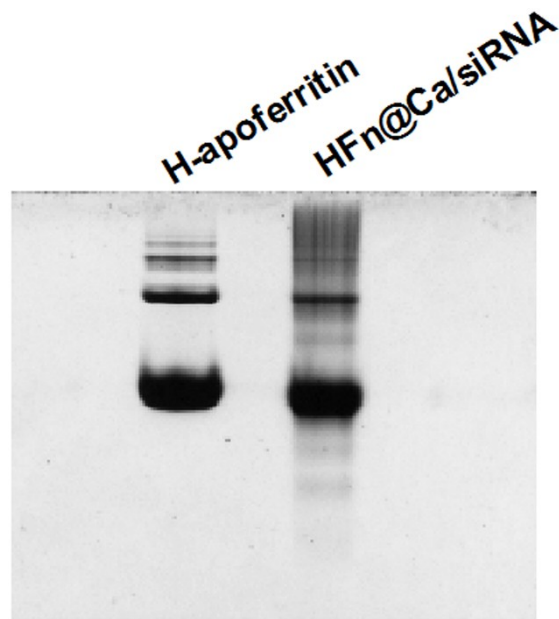

**Figure S4.** Characterization of the reassembly protein cage of HFn and HFn@CaP/siRNA with 6 % continuous native gel electrophoresis.

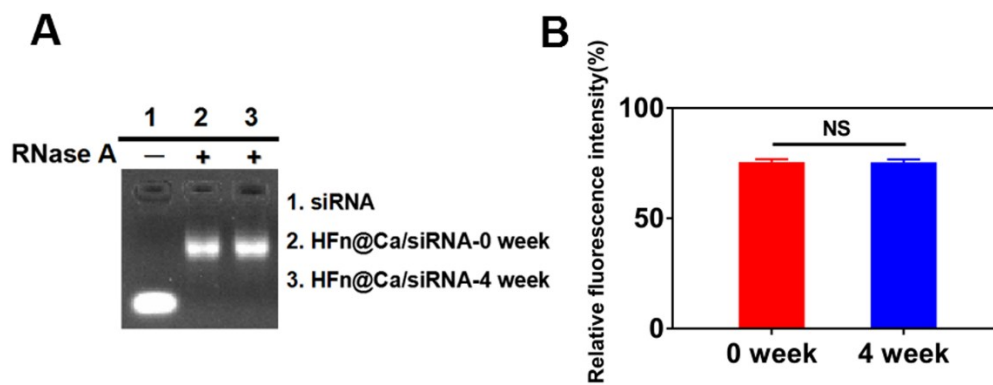

**Figure S5. (A)** Stability of HFn@Ca/siRNA (1 : 8) NPs before and after stored at 4 °C for four weeks, detected by AGE. **(B)** The fluorescence intensity analysis of HFn@Ca/siRNA NPs according to section A.

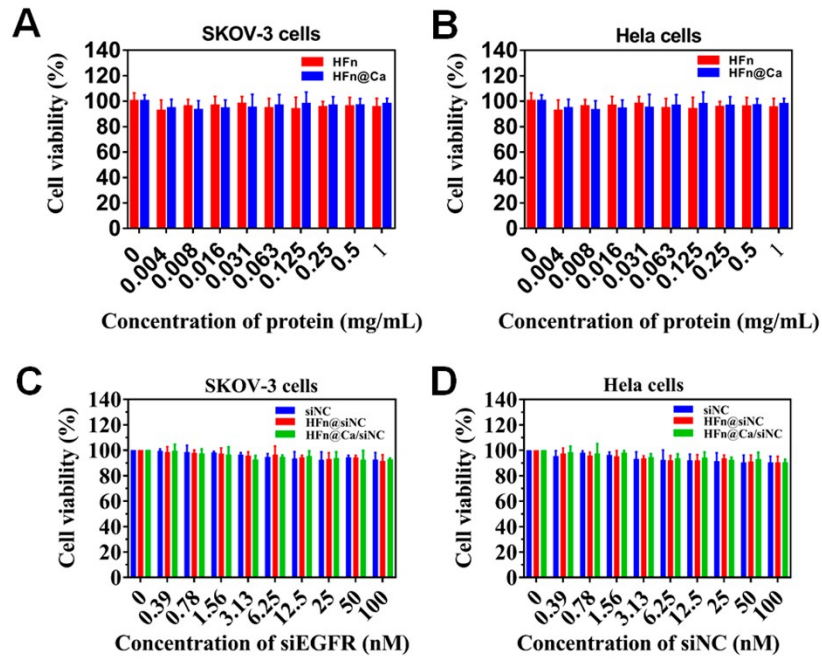

**Figure S6.** Cytotoxicity evaluation of HFn and HFn@Ca NPs in SKOV-3 cells (A) and HeLa cells (B) after 48 h incubation. Cytotoxicity of siNC, HFn@NC and HFn@Ca/siNC NPs at different concentrations in SKOV-3 cells (C) and HeLa cells (D) after incubation for 48 h.



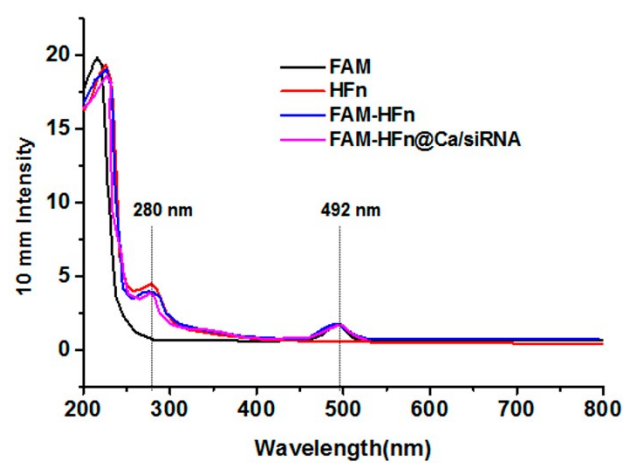

**Figure S7.** UV vis absorption spectra of FAM, HFn, FAM-HFn, and FAM-HFn@Ca/siRNA NPs.

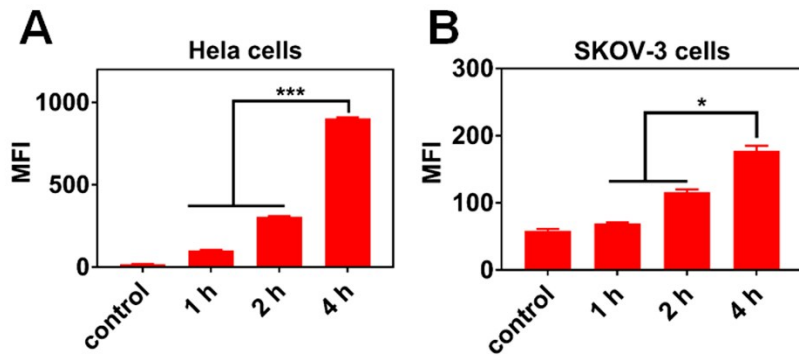

**Figure S8.** *In vitro* cellular uptake of FAM-HFn@Ca NPs incubated with HeLa cells (A) or SKOV-3 cells (B) by flow cytometry. \* $p < 0.05$ , \*\*\* $p < 0.001$ .

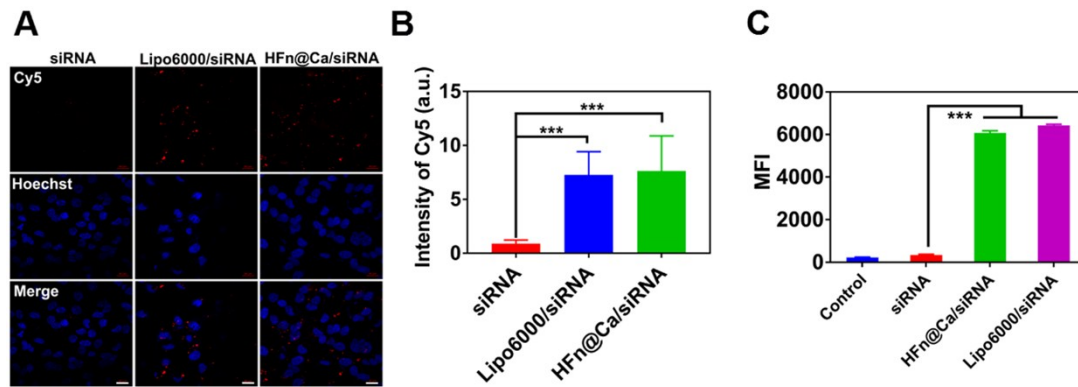

**Figure S9.** (A) Cellular uptake studies in HeLa cells incubated with siRNA, Lipo6000/siRNA and HFn@Ca/Cy5-siRNA NPs for 4 h by CLSM. (B) Analysis of Cy5 intensity by Image J according to section A. (C) Cellular uptake of HFn@Ca/Cy5-siRNA NPs incubated with HeLa cells by flow cytometry. The scale bar was 20  $\mu$ m. \*\*\* $p$ <0.001.

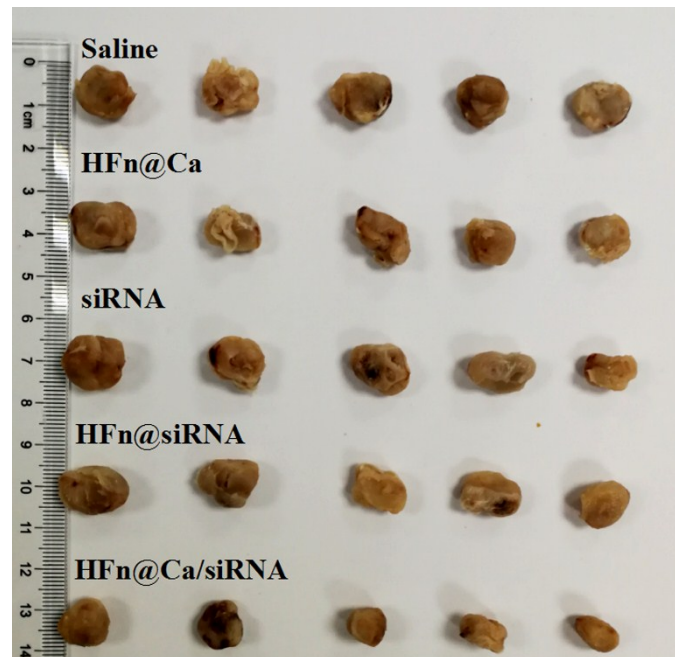

**Figure S10.** Images of excised tumors of each group with saline, HFn@Ca, siRNA, HFn@siRNA and HFn@Ca/siRNA after last injection treatment (n = 5).
